# Supplementary material for: Universal School Meals in the US: What Can We Learn from the Community Eligibility Provision?
Source: MDPI journal article supplement (doi:10.3390/nu13082634), 2021-07-30
Supplement: s1 [file s1]

**Figure S1. Event Study, Results: Daily school attendance (%), Full Sample**

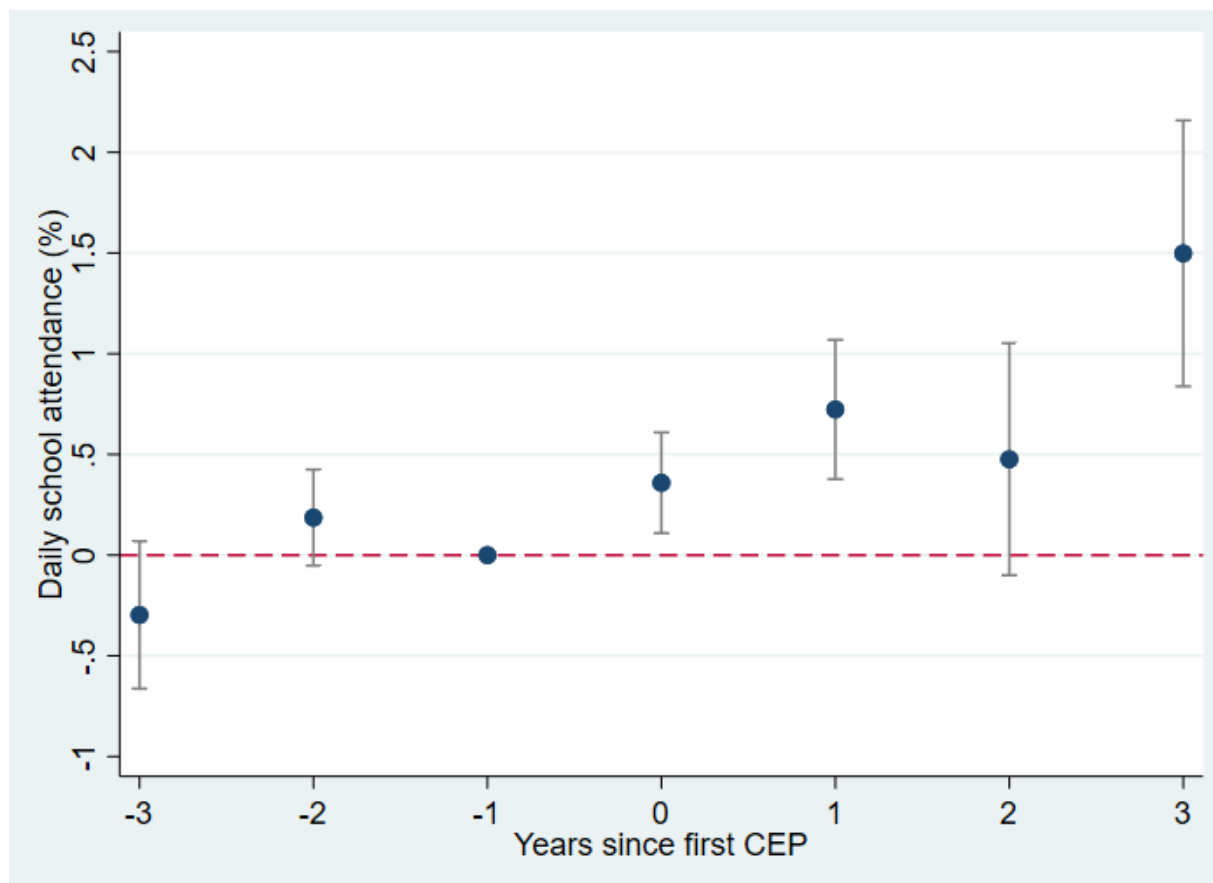

SOURCE: U.S. Department of Education, National Center for Education Statistics, Early Childhood Longitudinal Study, Kindergarten Class of 2010-11 (ECLS-K:2011), 2011-2016.

Notes: CEP: Community Eligibility Provision.

Figures display point estimates and corresponding 95 percent confidence intervals for the coefficients in event study.

The year just prior to first CEP exposure (-1) is the reference year.

All regressions include child random effects, school fixed effects, year fixed effects, and child-, and family-level covariates such as child's gender, race/ethnicity, household income below the 200% federal poverty level, primary language at home other than English and mother's education, and school-level time varying covariates such as percentage of poverty in a school district and the duration of the CEP participation by the school.

**Figure S2. Event Study, Results: School % of eligible for free or reduced-price lunch, Full Sample**

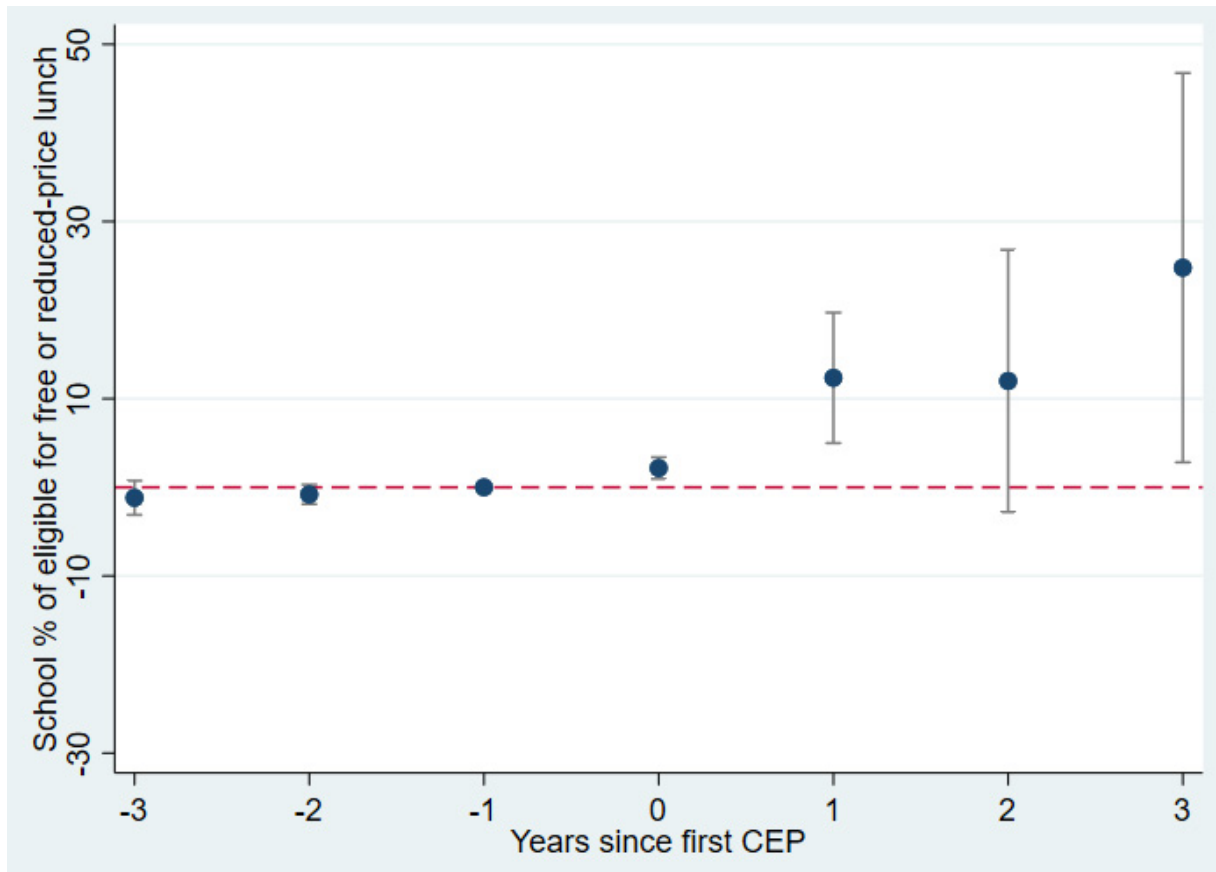

SOURCE: U.S. Department of Education, National Center for Education Statistics, Early Childhood Longitudinal Study, Kindergarten Class of 2010-11 (ECLS-K:2011), 2011-2016.

Notes: CEP: Community Eligibility Provision.

Figures display point estimates and corresponding 95 percent confidence intervals for the coefficients in event study.

The year just prior to first CEP exposure (-1) is the reference year.

All regressions include child random effects, school fixed effects, year fixed effects, and child-, and family-level covariates such as child's gender, race/ethnicity, household income below the 200% federal poverty level, primary language at home other than English and mother's education, and school-level time varying covariates such as percentage of poverty in a school district and the duration of the CEP participation by the school.

**Figure S3. Event Study, Results: Child's receipt of complete school lunches for free or reduced price, Full Sample**

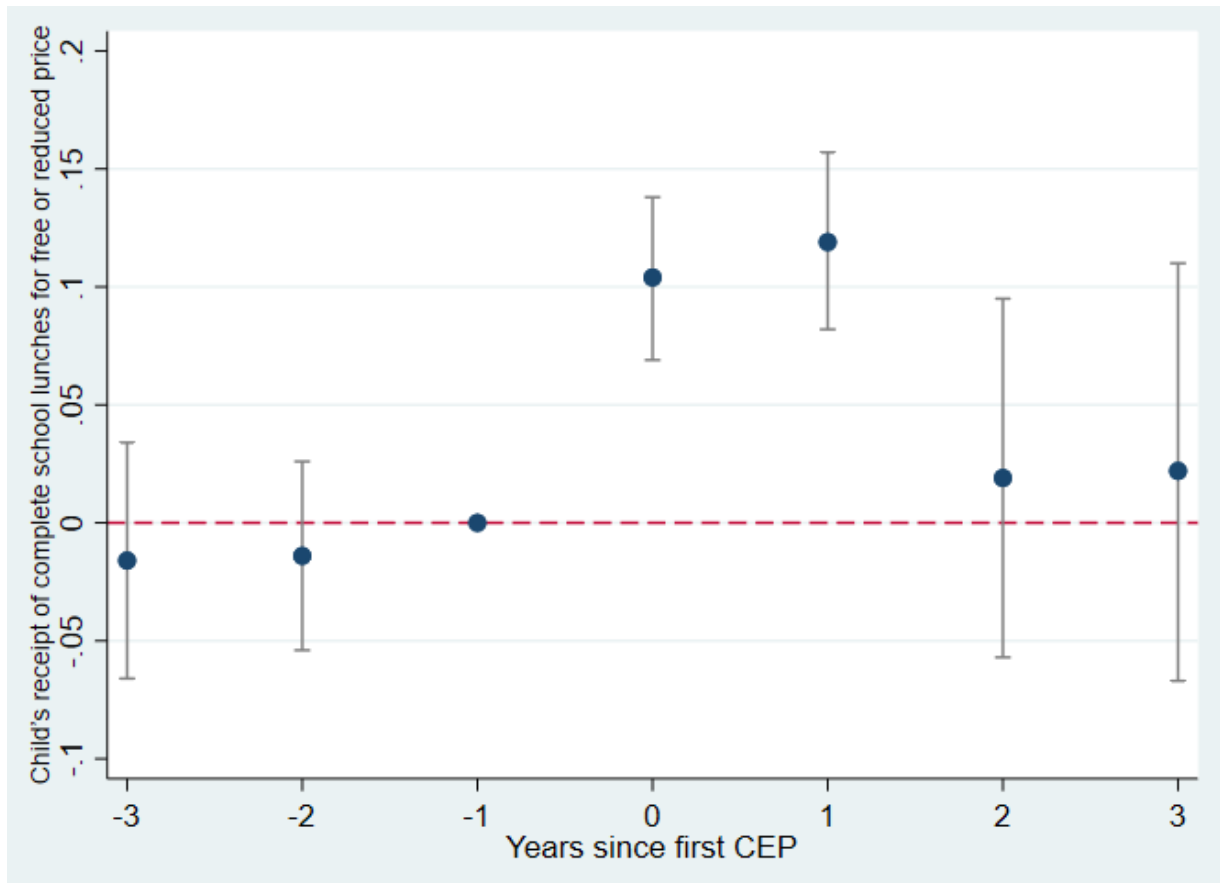

SOURCE: U.S. Department of Education, National Center for Education Statistics, Early Childhood Longitudinal Study, Kindergarten Class of 2010-11 (ECLS-K:2011), 2011-2016.

Notes: CEP: Community Eligibility Provision.

Figures display point estimates and corresponding 95 percent confidence intervals for the coefficients in event study.

The year just prior to first CEP exposure (-1) is the reference year.

All regressions include child random effects, school fixed effects, year fixed effects, and child-, and family-level covariates such as child's gender, race/ethnicity, household income below the 200% federal poverty level, primary language at home other than English and mother's education, and school-level time varying covariates such as percentage of poverty in a school district and the duration of the CEP participation by the school.
